# Supplementary material for: Performance of universal early warning scores in different patient subgroups and clinical settings: a systematic review
Source: HighWire-hosted journal article supplement (doi:10.1136/bmjopen-2020-045849), 2021-04-01
Supplement: bmjopen-2020-045849supp001_data_supplement.pdf [file bmjopen-2020-045849supp001_data_supplement.pdf]

The performance of early warning scores in different patient subgroups and clinical settings: A systematic review.

| Page number | Contents                                                                                                                                                                  |
|-------------|---------------------------------------------------------------------------------------------------------------------------------------------------------------------------|
| 2           | Supplementary methods: Search strategy for MEDLINE                                                                                                                        |
| 4           | Supplementary methods: Search strategy for CINAHL                                                                                                                         |
| 5           | Supplementary methods: Patients' subgroups                                                                                                                                |
| 6           | Supplementary references                                                                                                                                                  |
| 14          | Table S1. Risk of bias assessment results                                                                                                                                 |
| 17          | Table S2. Early warning scores used in studies of patients' sub-populations and settings                                                                                  |
| 21          | Figure S1. Predictive performance of early warning scores for mortality in studies from 2005 to 2020 for different disease subgroups and clinical settings                |
| 22          | Figure S2. Predictive performance of early warning scores for intensive care admission in studies from 2005 to 2020 for different disease subgroups and clinical settings |
| 23          | Figure S3. Predictive performance of early warning scores for cardiac arrest in studies from 2012 to 2020 for different disease subgroups and clinical settings           |

## Supplementary methods: Search strategy for MEDLINE

- 1- EWS OR early warning score\* OR EARLY WARNING SYSTEM\* OR RAPID RESPONSE SYSTEM\* OR MEWS OR MODIFIED EARLY WARNING SCORE\* OR MODIFIED EARLY WARNING SYSTEM\* OR news OR national early warning score OR news2 OR national early warning score 2 OR ( track and trigger system\* )
- 2- (MH "Intensive Care Units")
- 3- ICU OR intensive care unit\* OR CRITICAL CARE UNIT\* OR CRITICAL CARE
- 4- 2 OR 3
- 5- 1 AND 4
- 6- (MH "Nervous System Diseases")
- 7- neurological disorder\* OR neurological disease OR neurological condition\*
- 8- 6 OR 7
- 9- 1 AND 8
- 10- MH "Cardiovascular Diseases") OR (MH "Cardiology")
- 11- (MH "Thoracic Surgery")
- 12- cardiovascular disease\* OR cardiovascular disorder\* OR heart disease\* OR cardiology\* OR cardiac surgery OR thoracic surgery
- 13- 10 OR 11 OR 12
- 14- 1 AND 13
- 15- (MH "Musculoskeletal Diseases") OR (MH "Orthopedics")
- 16- orthopedic disease\* OR orthopedic surgery
- 17- 15 OR 16
- 18- 1 AND 17
- 19- (MH "Kidney Diseases, Cystic") OR (MH "Kidney Failure, Chronic") OR (MH "Polycystic Kidney Diseases") OR (MH "Renal Insufficiency, Chronic")
- 20- renal disease\* OR renal failure OR kidney disease\*
- 21- 19 OR 20
- 22- 1 AND 21
- 23- (MH "Hematologic Diseases")
- 24- hematologic disorder\* OR hematologic disease\* OR hematology
- 25- 23 OR 24
- 26- 1 AND 25
- 27- (MH "Respiratory Tract Diseases")
- 28- respiratory disease\* OR respiratory disorder\*
- 29- 27 OR 28
- 30- 1 AND 29
- 31- (MH "Gastroenterology")
- 32- gastrointestinal disorder\* OR gastrointestinal disease\* OR gastroenterology OR hepatology
- 33- 31 OR 32
- 34- 1 AND 33
- 35- (MH "Medical Oncology") OR (MH "Surgical Oncology")
- 36- oncology OR cancer OR chemotherapy
- 37- 35 OR 36
- 38- 1 AND 37
- 39- (MH "Wounds and Injuries") OR (MH "Emergency Medicine")
- 40- emergency department\* OR emergency OR emergency room\* OR trauma\*
- 41- 39 OR 40
- 42- 1 AND 41
- 43- (MH "Sepsis") OR (MH "Infection")
- 44- INFECTION\* OR INFECTIOUS DISEASE\* OR SEPSIS
- 45- 43 OR 44
- 46- 1 AND 45
- 47- (MH "Obstetrics")
- 48- (obstetrics and gynecology) OR OBSTETRIC\*
- 49- 47 OR 48
- 50- 1 AND 49
- 51- (MH "Allergy and Immunology")
- 52- immunological disease\* OR immunological disorder\*

53- 51 OR 52  
54- 1 AND 53  
55- (MH "Internal Medicine")  
56- medical ward\*  
57- 55 OR 56  
58- 1 AND 57  
59- (MH "General Surgery")  
60- surgical ward\*  
61- 59 OR 60  
62- 1 AND 61  
63- 5 OR 9 OR 14 OR 18 OR 22 OR 26 OR 30 OR 34 OR 38 OR 42 OR 46 OR 50 OR 54 OR 58 OR 62

## Supplementary methods: Search strategy for CINAHL

- 1- EWS OR early warning score\* OR EARLY WARNING SYSTEM\* OR RAPID RESPONSE SYSTEM\* OR MEWS OR MODIFIED EARLY WARNING SCORE\* OR MODIFIED EARLY WARNING SYSTEM\* OR news OR national early warning score OR news2 OR national early warning score 2 OR ( track and trigger system\* )
- 2- (MH "Intensive Care Units")
- 3- ICU OR intensive care unit\* OR CRITICAL CARE UNIT\* OR CRITICAL CARE
- 4- 2 OR 3
- 5- 1 AND 4
- 6- (MH "Nervous System Diseases")
- 7- neurological disorder\* OR neurological disease OR neurological condition\*
- 8- 6 OR 7
- 9- 1 AND 8
- 10- (MH "Heart Diseases") OR (MH "Cardiovascular Diseases")
- 11- (MH "Heart Surgery")
- 12- cardiovascular disease\* OR cardiovascular disorder\* OR heart disease\* OR cardiology\* OR cardiac surgery OR thoracic surgery
- 13- 10 OR 11 OR 12
- 14- 1 AND 13
- 15- (MH "Orthopedic Surgery") OR (MH "Musculoskeletal Diseases")
- 16- orthopedic disease\* OR orthopedic surgery
- 17- 15 OR 16
- 18- 1 AND 17
- 19- (MH "Kidney, Cystic") OR (MH "Kidney Diseases")
- 20- renal disease\* OR renal failure OR kidney disease\*
- 21- 19 OR 20
- 22- 1 AND 21
- 23- (MH "Hematologic Diseases")
- 24- (MH "Lymphatic Diseases")
- 25- hematologic disorder\* OR hematologic disease\* OR hematology
- 26- 23 OR 24 OR 25
- 27- 1 AND 26
- 28- (MH "Respiratory Tract Diseases")
- 29- respiratory disease\* OR respiratory disorder\*
- 30- 28 OR 29
- 31- 1 AND 30
- 32- (MH "Digestive System Diseases")
- 33- gastrointestinal disorder\* OR gastrointestinal disease\* OR gastroenterology OR hepatology
- 34- 32 OR 33
- 35- 1 AND 34
- 36- (MH "Cancer Patients") OR (MH "Oncology")
- 37- oncology OR cancer OR chemotherapy
- 38- 36 OR 37
- 39- 1 AND 38
- 40- (MH "Wounds and Injuries") OR (MH "Trauma")
- 41- emergency department\* OR emergency OR emergency room\* OR trauma\*
- 42- 40 OR 41
- 43- 1 AND 42
- 44- (MH "Infection")
- 45- INFECTION\* OR INFECTIOUS DISEASE\* OR SEPSIS
- 46- 44 OR 45
- 47- 1 AND 46
- 48- (MH "Obstetric Emergencies") OR (MH "Obstetric Patients")
- 49- ( obstetrics and gynecology ) OR OBSTETRIC\*
- 50- 48 OR 49
- 51- 1 AND 50
- 52- (MH "Internal Medicine")
- 53- (MH "Allergy and Immunology")

- 54- medical ward
- 55- immunological disease\* OR immunological disorder\*
- 56- 52 OR 53 OR 54 OR 55
- 57- 1 AND 56
- 58- (MH "Surgical Patients")
- 59- surgical ward\*
- 60- 58 OR 59
- 61- 1 AND 60
- 62- 5 OR 9 OR 14 OR 18 OR 22 OR 27 OR 31 OR 35 OR 39 OR 43 OR OR 47 OR 51 OR 57 OR 61

### Supplementary methods: Patients' subgroups

- 1- Cardiology patients
- 2- Neurology patients
- 3- Orthopaedic patients
- 4- Renal patients
- 5- Haematology patients
- 6- Respiratory patients
- 7- Gastroenterology patients
- 8- Oncology patients
- 9- Emergency patients
- 10- Infection patients
- 11- Medical patients
- 12- Surgical patients
- 13- Intensive care patients

## Supplementary References

1. Kellett J, Kim A. Validation of an abbreviated Vitalpac™ Early Warning Score (ViEWS) in 75,419 consecutive admissions to a Canadian regional hospital. *Resuscitation*. 2012 Mar;83(3):297–302.
2. Kim W-Y, Lee J, Lee J-R, Jung YK, Kim HJ, Huh JW, et al. A risk scoring model based on vital signs and laboratory data predicting transfer to the intensive care unit of patients admitted to gastroenterology wards. *J Crit Care*. 2017 Aug;40:213–7.
3. Bozkurt S, Köse A, Arslan ED, Erdoğan S, Üçbilek E, Çevik İ, et al. Validity of modified early warning, Glasgow Blatchford, and pre-endoscopic Rockall scores in predicting prognosis of patients presenting to emergency department with upper gastrointestinal bleeding. *Scand J Trauma Resusc Emerg Med*. 2015 Dec 30;23:109.
4. Seak C-J, Yen DH-T, Ng C-J, Wong Y-C, Hsu K-H, Seak JC-Y, et al. Rapid Emergency Medicine Score: A novel prognostic tool for predicting the outcomes of adult patients with hepatic portal venous gas in the emergency department. *PLoS One*. 2017 Sep 15;12(9):e0184813–e0184813.
5. Hu SB, Wong DJL, Correa A, Li N, Deng JC. Prediction of Clinical Deterioration in Hospitalized Adult Patients with Hematologic Malignancies Using a Neural Network Model. *PLoS One*. 2016 Aug 17;11(8):e0161401–e0161401.
6. Liljehult J, Christensen T. Early warning score predicts acute mortality in stroke patients. *Acta Neurol Scand*. 2016 Apr;133(4):261–7.
7. Mulligan A. Validation of a physiological track and trigger score to identify developing critical illness in haematology patients. *Intensive Crit Care Nurs*. 2010 Aug;26(4):196–206.
8. Cooksley T, Kitlowski E, Haji-Michael P. Effectiveness of Modified Early Warning Score in predicting outcomes in oncology patients. *QJM Mon J Assoc Physicians*. 2012 Nov;105(11):1083–8.
9. Vaughn JL, Kline D, Denlinger NM, Andritsos LA, Exline MC, Walker AR. Predictive performance of early warning scores in acute leukemia patients receiving induction chemotherapy. *Leuk Lymphoma*. 2018 Jun;59(6):1498–500.
10. Young RS, Gobel BH, Schumacher M, Lee J, Weaver C, Weitzman S. Use of the modified early warning score and serum lactate to prevent cardiopulmonary arrest in hematology-oncology patients: a quality improvement study. *Am J Med Qual*. 2014 Nov;29(6):530–7.
11. von Lilienfeld-Toal M, Midgley K, Lieberbach S, Barnard L, Glasmacher A, Gilleece M, et al. Observation-based early warning scores to detect impending critical illness predict in-hospital and overall survival in patients undergoing allogeneic stem cell transplantation. *Biol Blood Marrow Transplant J Am Soc Blood Marrow Transplant*. 2007 May;13(5):568–76.
12. Pedersen NE, Rasmussen LS, Petersen JA, Gerds TA, Østergaard D, Lippert A. Modifications of the National Early Warning Score for patients with chronic respiratory disease. *Acta Anaesthesiol Scand*. 2018 Feb;62(2):242–52.
13. Forster S, Housley G, McKeever TM, Shaw DE. Investigating the discriminative value of Early Warning Scores in patients with respiratory disease using a retrospective cohort analysis of admissions to Nottingham University Hospitals Trust over a 2-year period. *BMJ Open*. 2018 Jul 30;8(7):e020269–e020269.
14. Pimentel MAF, Redfern OC, Gerry S, Collins GS, Malycha J, Prytherch D, et al. A comparison of the ability of the National Early Warning Score and the National Early

- Warning Score 2 to identify patients at risk of in-hospital mortality: A multi-centre database study. *Resuscitation*. 2018 Oct;131:N.PAG-N.PAG.
15. Sbiti-Rohr D, Kutz A, Christ-Crain M, Thomann R, Zimmerli W, Hoess C, et al. The National Early Warning Score (NEWS) for outcome prediction in emergency department patients with community-acquired pneumonia: results from a 6-year prospective cohort study. *BMJ Open* 2016 Sep 28;6(9):e011021–e011021.
  16. Brabrand M, Hallas P, Hansen SN, Jensen KM, Madsen JLB, Posth S. Using scores to identify patients at risk of short term mortality at arrival to the acute medical unit: A validation study of six existing scores. *Eur J Intern Med*. 2017 Nov;45:32–6.
  17. Jo S, Jeong T, Lee JB, Jin Y, Yoon J, Park B, et al. Validation of modified early warning score using serum lactate level in community-acquired pneumonia patients. The National Early Warning Score-Lactate score. *Am J Emerg Med*. 2016 Mar;34(3):536–41.
  18. Barlow G, Nathwani D, Davey P. The CURB65 pneumonia severity score outperforms generic sepsis and early warning scores in predicting mortality in community-acquired pneumonia. *Thorax*. 2007 Mar;62(3):253–9.
  19. Bilben B, Grandal L, Søvik S. National Early Warning Score (NEWS) as an emergency department predictor of disease severity and 90-day survival in the acutely dyspneic patient - a prospective observational study. *Scand J Trauma Resusc Emerg Med*. 2016 Jun 2;24:80.
  20. Delahanty RJ, Alvarez J, Flynn LM, Sherwin RL, Jones SS. Development and Evaluation of a Machine Learning Model for the Early Identification of Patients at Risk for Sepsis. *Ann Emerg Med* 2019 Apr;73(4):334–44.
  21. Redfern OC, Smith GB, Prytherch DR, Meredith P, Inada-Kim M, Schmidt PE. A Comparison of the Quick Sequential (Sepsis-Related) Organ Failure Assessment Score and the National Early Warning Score in Non-ICU Patients With/Without Infection. *Crit Care Med*. 2018 Dec;46(12):1923–33.
  22. Churpek MM, Snyder A, Sokol S, Pettit NN, Edelson DP. Investigating the Impact of Different Suspicion of Infection Criteria on the Accuracy of Quick Sepsis-Related Organ Failure Assessment, Systemic Inflammatory Response Syndrome, and Early Warning Scores. *Crit Care Med*. 2017 Nov;45(11):1805–12.
  23. Faisal M, Richardson D, Scally AJ, Howes R, Beatson K, Speed K, et al. Computer-aided National Early Warning Score to predict the risk of sepsis following emergency medical admission to hospital: a model development and external validation study. *C Can Med Assoc J = J L'association Medicale Can*. 2019 Apr 8;191(14):E382–9.
  24. Churpek MM, Snyder A, Han X, Sokol S, Pettit N, Howell MD, et al. Quick Sepsis-related Organ Failure Assessment, Systemic Inflammatory Response Syndrome, and Early Warning Scores for Detecting Clinical Deterioration in Infected Patients outside the Intensive Care Unit. *Am J Respir Crit Care Med*. 2017 Apr 1;195(7):906–11.
  25. Henry KE, Hager DN, Pronovost PJ, Saria S. A targeted real-time early warning score (TREWScore) for septic shock. *Sci Transl Med*. 2015 Aug 5;7(299):299ra122–299ra122.
  26. Brink A, Alsma J, Verdonschot RJCG, Rood PPM, Zietse R, Lingsma HF, et al. Predicting mortality in patients with suspected sepsis at the Emergency Department; A retrospective cohort study comparing qSOFA, SIRS and National Early Warning Score. *PLoS One*. 2019 Jan 25;14(1):e0211133–e0211133.
  27. de Groot B, Stolwijk F, Warmerdam M, Lucke JA, Singh GK, Abbas M, et al. The most commonly used disease severity scores are inappropriate for risk stratification of older emergency department sepsis patients: an observational multi-centre study. *Scand J Trauma Resusc Emerg Med*. 2017 Sep 11;25(1):91.

28. Corfield AR, Lees F, Zealley I, Houston G, Dickie S, Ward K, et al. Utility of a single early warning score in patients with sepsis in the emergency department. *Emerg Med J*. 2014 Jun;31(6):482–7.
29. Goulden R, Hoyle M-C, Monis J, Railton D, Riley V, Martin P, et al. qSOFA, SIRS and NEWS for predicting inhospital mortality and ICU admission in emergency admissions treated as sepsis. *Emerg Med J EMJ*. 2018 Jun;35(6):345–9.
30. Khwannimit B, Bhurayanontachai R, Vattanavanit V. Comparison of the accuracy of three early warning scores with SOFA score for predicting mortality in adult sepsis and septic shock patients admitted to intensive care unit. *Hear Lung J Crit Care*. 2019 May;48(3):240–4.
31. Ghanem-Zoubi NO, Vardi M, Laor A, Weber G, Bitterman H. Assessment of disease-severity scoring systems for patients with sepsis in general internal medicine departments. *Crit Care*. 2011;15(2):R95–R95.
32. Saeed K, Wilson DC, Bloos F, Schuetz P, van der Does Y, Melander O, et al. The early identification of disease progression in patients with suspected infection presenting to the emergency department: a multi-centre derivation and validation study. *Crit Care*. 2019 Feb 8;23(1):40.
33. Innocenti F, Tozzi C, Donnini C, De Villa E, Conti A, Zanobetti M, et al. SOFA score in septic patients: incremental prognostic value over age, comorbidities, and parameters of sepsis severity. *Intern Emerg Med*. 2018 Apr;13(3):405–12.
34. Camm CF, Hayward G, Elias TCN, Bowen JST, Hassanzadeh R, Fanshawe T, et al. Sepsis recognition tools in acute ambulatory care: associations with process of care and clinical outcomes in a service evaluation of an Emergency Multidisciplinary Unit in Oxfordshire. *BMJ Open*. 2018 Apr 9;8(4):e020497–e020497.
35. Tirota D, Gambacorta M, La Regina M, Attardo T, Lo Gullo A, Panzone F, et al. Evaluation of the threshold value for the modified early warning score (MEWS) in medical septic patients: a secondary analysis of an Italian multicentric prospective cohort (SNOOPII study). *QJM Mon J Assoc Physicians*. 2017 Jun 1;110(6):369–73.
36. Pong JZ, Fook-Chong S, Koh ZX, Samsudin MI, Tagami T, Chiew CJ, et al. Combining Heart Rate Variability with Disease Severity Score Variables for Mortality Risk Stratification in Septic Patients Presenting at the Emergency Department. *Int J Environ Res Public Health*. 2019 May 16;16(10).
37. Prabhakar SM, Tagami T, Liu N, Samsudin MI, Ng JCJ, Koh ZX, et al. Combining quick sequential organ failure assessment score with heart rate variability may improve predictive ability for mortality in septic patients at the emergency department. *PLoS One*. 2019 Mar 18;14(3):e0213445–e0213445.
38. Martino IF, Figgiaconi V, Seminari E, Muzzi A, Corbella M, Perlini S. The role of qSOFA compared to other prognostic scores in septic patients upon admission to the emergency department. *Eur J Intern Med*. 2018 Jul;53:e11–3.
39. Vorwerk C, Loryman B, Coats TJ, Stephenson JA, Gray LD, Reddy G, et al. Prediction of mortality in adult emergency department patients with sepsis. *Emerg Med J EMJ*. 2009 Apr;26(4):254–8.
40. Qin Q, Xia Y, Cao Y. Clinical study of a new Modified Early Warning System scoring system for rapidly evaluating shock in adults. *J Crit Care*. 2017 Feb;37:50–5.
41. Schmedding M, Adegbite BR, Gould S, Beyeme JO, Adegnika AA, Grobusch MP, et al. A Prospective Comparison of Quick Sequential Organ Failure Assessment, Systemic Inflammatory Response Syndrome Criteria, Universal Vital Assessment, and Modified Early Warning Score to Predict Mortality in Patients with Suspected Infection in Gabon. *Am J Trop Med Hyg*. 2019 Jan;100(1):202–8.



42. Albur M, Hamilton F, MacGowan AP. Early warning score: a dynamic marker of severity and prognosis in patients with Gram-negative bacteraemia and sepsis. *Ann Clin Microbiol Antimicrob*. 2016 Apr 12;15:23.
43. Cildir E, Bulut M, Akalin H, Kocabas E, Ocakoglu G, Aydin SA, et al. Evaluation of the modified MEDS, MEWS score and Charlson comorbidity index in patients with community acquired sepsis in the emergency department. *Intern Emerg Med*. 2013 Apr;8(3):255–60.
44. Chiew CJ, Liu N, Tagami T, Wong TH, Koh ZX, Ong MEH. Heart rate variability based machine learning models for risk prediction of suspected sepsis patients in the emergency department. *Medicine (Baltimore)*. 2019 Feb;98(6):e14197–e14197.
45. Samsudin MI, Liu N, Prabhakar SM, Chong S-L, Kit Lye W, Koh ZX, et al. A novel heart rate variability based risk prediction model for septic patients presenting to the emergency department. *Medicine (Baltimore)*. 2018 Jun;97(22):e10866–e10866.
46. Chang S-H, Hsieh C-H, Weng Y-M, Hsieh M-S, Goh ZNL, Chen H-Y, et al. Performance Assessment of the Mortality in Emergency Department Sepsis Score, Modified Early Warning Score, Rapid Emergency Medicine Score, and Rapid Acute Physiology Score in Predicting Survival Outcomes of Adult Renal Abscess Patients in the Emergency D. *Biomed Res Int*. 2018 Sep 19;2018:6983568.
47. Geier F, Popp S, Greve Y, Achterberg A, Glöckner E, Ziegler R, et al. Severity illness scoring systems for early identification and prediction of in-hospital mortality in patients with suspected sepsis presenting to the emergency department. *Wien Klin Wochenschr*. 2013 Sep;125(17–18):508–15.
48. Asiiimwe SB, Abdallah A, Ssekitoleko R. A simple prognostic index based on admission vital signs data among patients with sepsis in a resource-limited setting. *Crit Care*. 2015 Mar 16;19:86.
49. Hung S-K, Ng C-J, Kuo C-F, Goh ZNL, Huang L-H, Li C-H, et al. Comparison of the Mortality in Emergency Department Sepsis Score, Modified Early Warning Score, Rapid Emergency Medicine Score and Rapid Acute Physiology Score for predicting the outcomes of adult splenic abscess patients in the emergency department. *PLoS One*. 2017 Nov 1;12(11):e0187495–e0187495.
50. Garcea G, Jackson B, Pattenden CJ, Sutton CD, Neal CP, Dennison AR, et al. Early warning scores predict outcome in acute pancreatitis. *J Gastrointest Surg Off J Soc Surg Aliment Tract*. 2006 Jul;10(7):1008–15.
51. Yoo J-W, Lee JR, Jung YK, Choi SH, Son JS, Kang BJ, et al. A combination of early warning score and lactate to predict intensive care unit transfer of inpatients with severe sepsis/septic shock. *Korean J Intern Med*. 2015 Jul;30(4):471–7.
52. Siddiqui S, Chua M, Kumaresh V, Choo R. A comparison of pre ICU admission SIRS, EWS and q SOFA scores for predicting mortality and length of stay in ICU. *J Crit Care*. 2017 Oct;41:191–3.
53. Calvert J, Desautels T, Chettipally U, Barton C, Hoffman J, Jay M, et al. High-performance detection and early prediction of septic shock for alcohol-use disorder patients. *Ann Med Surg*. 2016 May 10;8:50–5.
54. Awad A, Bader-El-Den M, McNicholas J, Briggs J. Early hospital mortality prediction of intensive care unit patients using an ensemble learning approach. *Int J Med Inform*. 2017 Dec;108:185–95.
55. Reini K, Fredrikson M, Oscarsson A. The prognostic value of the Modified Early Warning Score in critically ill patients: a prospective, observational study. *Eur J Anaesthesiol*. 2012 Mar;29(3):152–7.
56. Chen Y-C, Yu W-K, Ko H-K, Pan S-W, Chen Y-W, Ho L-I, et al. Post-intensive care unit respiratory failure in older patients liberated from intensive care unit and ventilator: The

- predictive value of the National Early Warning Score on intensive care unit discharge. *Geriatr Gerontol Int*. 2019 Apr;19(4):317–22.
57. Baker T, Blixt J, Lugazia E, Schell CO, Mulungu M, Milton A, et al. Single Deranged Physiologic Parameters Are Associated With Mortality in a Low-Income Country. *Crit Care Med*. 2015 Oct;43(10):2171–9.
58. Gök RGY, Gök A, Bulut M. Assessing prognosis with modified early warning score, rapid emergency medicine score and worthing physiological scoring system in patients admitted to intensive care unit from emergency department. *Int Emerg Nurs*. 2019 Mar;43:9–14.
59. Moseson EM, Zhuo H, Chu J, Stein JC, Matthay MA, Kangelaris KN, et al. Intensive care unit scoring systems outperform emergency department scoring systems for mortality prediction in critically ill patients: a prospective cohort study. *J Intensive Care*. 2014 Jul 1;2:40.
60. Jo S, JB L, YH J, TO J, JC Y, YK J, et al. Modified early warning score with rapid lactate level in critically ill medical patients: the ViEWS-L score. *Emerg Med J*. 2013 Feb;30(2):123–9.
61. Kwon J-M, Lee Y, Lee Y, Lee S, Park H, Park J. Validation of deep-learning-based triage and acuity score using a large national dataset. *PLoS One*. 2018 Oct 15;13(10):e0205836–e0205836.
62. Usman OA, Usman AA, Ward MA. Comparison of SIRS, qSOFA, and NEWS for the early identification of sepsis in the Emergency Department. *Am J Emerg Med*. 2018 Nov 7.
63. Jang D-H, Kim J, Jo YH, Lee JH, Hwang JE, Park SM, et al. Developing neural network models for early detection of cardiac arrest in emergency department. *Am J Emerg Med*. 2019 Apr 7.
64. Wei X, Ma H, Liu R, Zhao Y. Comparing the effectiveness of three scoring systems in predicting adult patient outcomes in the emergency department. *Medicine (Baltimore)*. 2019 Feb;98(5):e14289–e14289.
65. Lee SB, Kim DH, Kim T, Kang C, Lee SH, Jeong JH, et al. Triage in Emergency Department Early Warning Score (TREWS) is predicting in-hospital mortality in the emergency department. *Am J Emerg Med*. 2019 Feb 17.
66. Singer AJ, Ng J, Thode HC, Spiegel R, Weingart S, Thode HCJ. Quick SOFA Scores Predict Mortality in Adult Emergency Department Patients With and Without Suspected Infection. *Ann Emerg Med*. 2017 Apr;69(4):475–9.
67. Eick C, Rizas KD, Meyer-Zürn CS, Grogan-Bada P, Hamm W, Kreth F, et al. Autonomic nervous system activity as risk predictor in the medical emergency department: a prospective cohort study. *Crit Care Med*. 2015 May;43(5):1079–86.
68. Bulut M, Cebicci H, Sigirli D, Sak A, Durmus O, Top AA, et al. The comparison of modified early warning score with rapid emergency medicine score: a prospective multicentre observational cohort study on medical and surgical patients presenting to emergency department. *Emerg Med J*. 2014 Jun;31(6):476–81.
69. Kivipuro M, Tirkkonen J, Kontula T, Solin J, Kalliomiäki J, Pauniahho S-L, et al. National early warning score (NEWS) in a Finnish multidisciplinary emergency department and direct vs. late admission to intensive care. *Resuscitation*. 2018 Jul;128:164–9.
70. Eckart A, Hauser SI, Kutz A, Haubitz S, Hausfater P, Amin D, et al. Combination of the National Early Warning Score (NEWS) and inflammatory biomarkers for early risk stratification in emergency department patients: results of a multinational, observational study. *BMJ Open*. 2019 Jan 17;9(1):e024636–e024636.
71. Ho LO, Li H, Shahidah N, Koh ZX, Sultana P, Hock Ong ME. Poor performance of the modified early warning score for predicting mortality in critically ill patients presenting to an emergency department. *World J Emerg Med*. 2013;4(4):273–8.

72. Skitch S, Tam B, Xu M, McInnis L, Vu A, Fox-Robichaud A. Examining the utility of the Hamilton early warning scores (HEWS) at triage: Retrospective pilot study in a Canadian emergency department. *CJEM Can J Emerg Med*. 2018 Mar;20(2):266–74.
73. Liu N, Koh ZX, Goh J, Lin Z, Haaland B, Ting BP, et al. Prediction of adverse cardiac events in emergency department patients with chest pain using machine learning for variable selection. *BMC Med Informatics Decis Mak*. 2014 Jan;14(1):75.
74. Dundar ZD, Ergin M, Karamercan MA, Ayranci K, Colak T, Tuncar A, et al. Modified Early Warning Score and VitalPac Early Warning Score in geriatric patients admitted to emergency department. *Eur J Emerg Med Off J Eur Soc Emerg Med*. 2016 Dec;23(6):406–12.
75. Yuan WC, Tao C, Dan ZD, Yi SC, Jing W, Jian Q. The significance of National Early Warning Score for predicting prognosis and evaluating conditions of patients in resuscitation room. *Hong Kong J Emerg Med*. 2018;25(6):324–30.
76. Naidoo DK, Rangiah S, Naidoo SS. An evaluation of the Triage Early Warning Score in an urban accident and emergency department in KwaZulu-Natal. *South African Fam Pract*. 2014 Jan;56(1):69–73.
77. Liu FY, Qin J, Wang RX, Fan XI, Wang J, Sun CY et al. A prospective validation of national early warning score in emergency intensive care unit patients at Beijing. *Hong Kong J Emerg Med*. 2015;22(3):137–44.
78. So S-N, Ong C-W, Wong L-Y, Chung JYM, Graham CA. Is the Modified Early Warning Score able to enhance clinical observation to detect deteriorating patients earlier in an Accident & Emergency Department? *Australas Emerg Nurs J*. 2015 Feb;18(1):24–32.
79. Dundar ZD, Kocak S, Girisgin AS. Lactate and NEWS-L are fair predictors of mortality in critically ill geriatric emergency department patients. *Am J Emerg Med*. 2019 Feb 7.
80. Lam TS, Mak PSK, Siu WS, Lam MY, Cheung TF, Rainer TH. Validation of a Modified Early Warning Score (MEWS) in emergency department observation ward patients. *Hong Kong J Emerg Med*. 2006;13(1):24–30.
81. Xie X, Huang W, Liu Q, Tan W, Pan L, Wang L, et al. Prognostic value of Modified Early Warning Score generated in a Chinese emergency department: a prospective cohort study. *BMJ Open*. 2018 Dec 14;8(12):e024120–e024120.
82. Cattermole GN, Mak SKP, Liow CHE, Ho MF, Hung KYG, Keung KM, et al. Derivation of a prognostic score for identifying critically ill patients in an emergency department resuscitation room. *Resuscitation*. 2009 Sep;80(9):1000–5.
83. Heitz CR, Gaillard JP, Blumstein H, Case D, Messick C, Miller CD. Performance of the maximum modified early warning score to predict the need for higher care utilization among admitted emergency department patients. *J Hosp Med*. 2010 Jan;5(1):E46-52.
84. Srivilaithon W, Amnuaypattanapon K, Limjindaporn C, Imsuwan I, Daorattanachai K, Dasanadeba I, et al. Predictors of in-hospital cardiac arrest within 24 h after emergency department triage: A case-control study in urban Thailand. *Emerg Med Australas EMA*. 2019 Mar 18.
85. Cattermole GN, Liow ECH, Graham CA, Rainer TH. THERM: the Resuscitation Management score. A prognostic tool to identify critically ill patients in the emergency department. *Emerg Med J*. 2014 Oct;31(10):803–7.
86. Najafi Z, Zakeri H, Mirhaghi A. The accuracy of acuity scoring tools to predict 24-h mortality in traumatic brain injury patients: A guide to triage criteria. *Int Emerg Nurs*. 2018 Jan;36:27–33.
87. Bartkowiak B, Snyder AM, Benjamin A, Schneider A, Twu NM, Churpek MM, et al. Validating the Electronic Cardiac Arrest Risk Triage (eCART) Score for Risk Stratification

- of Surgical Inpatients in the Postoperative Setting: Retrospective Cohort Study. *Ann Surg.* 2019 Jun;269(6):1059–63.
88. Kovacs C. Outreach and early warning systems for the prevention of intensive care admission and death of critically ill adult patients on general hospital wards. *Int J Nurs Pract.* 2016;
89. Plate JD, Peelen LM, Leenen LP, Hietbrink F. Validation of the VitalPAC Early Warning Score at the Intermediate Care Unit. *World J Crit Care Med.* 2018 Aug 4;7(3):39–45.
90. Sarani B. Accuracy of an expanded early warning score for patients in general and trauma surgery wards (*Br J Surg* 2012; 99: 192-197). *Br J Surg.* 2012 Feb;99(2):197–8.
91. Hollis RH, Graham LA, Lazenby JP, Brown DM, Taylor BB, Heslin MJ, et al. A Role for the Early Warning Score in Early Identification of Critical Postoperative Complications. *Ann Surg.* 2016 May;263(5):918–23.
92. Gardner-Thorpe J, Love N, Wrightson J, Walsh S, Keeling N. The value of Modified Early Warning Score (MEWS) in surgical in-patients: a prospective observational study. *Ann R Coll Surg Engl.* 2006 Oct;88(6):571–5.
93. Garcea G, Ganga R, Neal CP, Ong SL, Dennison AR, Berry DP. Preoperative early warning scores can predict in-hospital mortality and critical care admission following emergency surgery. *J Surg Res.* 2010 Apr;159(2):729–34.
94. Cuthbertson BH, Boroujerdi M, McKie L, Aucott L, Prescott G. Can physiological variables and early warning scoring systems allow early recognition of the deteriorating surgical patient? *Crit Care Med.* 2007 Feb;35(2):402–9.
95. Prytherch DR, Smith GB, Schmidt PE, Featherstone PI. ViEWS--Towards a national early warning score for detecting adult inpatient deterioration. *Resuscitation.* 2010 Aug;81(8):932–7.
96. Smith GB, Prytherch DR, Meredith P, Schmidt PE, Featherstone PI. The ability of the National Early Warning Score (NEWS) to discriminate patients at risk of early cardiac arrest, unanticipated intensive care unit admission, and death. *Resuscitation.* 2013 Apr;84(4):465–70.
97. Rasmussen LJH, Ladelund S, Haupt TH, Ellekilde GE, Eugen-Olsen J, Andersen O. Combining National Early Warning Score With Soluble Urokinase Plasminogen Activator Receptor (suPAR) Improves Risk Prediction in Acute Medical Patients: A Registry-Based Cohort Study. *Crit Care Med.* 2018 Dec;46(12):1961–8.
98. Ghosh E, Eshelman L, Yang L, Carlson E, Lord B. Early Deterioration Indicator: Data-driven approach to detecting deterioration in general ward. *Resuscitation.* 2018 Jan;122:99–105. =29122648&site=ehost-live&scope=site
99. Duckitt RW, Buxton-Thomas R, Walker J, Cheek E, Bewick V, Venn R, et al. Worthing physiological scoring system: derivation and validation of a physiological early-warning system for medical admissions. An observational, population-based single-centre study. *BJA Br J Anaesth.* 2007 May 22;98(6):769–74.
100. Colombo F, Taurino L, Colombo G, Amato M, Rizzo S, Murolo M et al. The Niguarda MEWS, a new and refined tool to determine criticality and instability in Internal Medicine Ward and Emergency Medicine Unit. *Ital J Med.* 2017;11(3):310–7.
101. Abbott TEF, Torrance HDT, Cron N, Vaid N, Emmanuel J. A single-centre cohort study of National Early Warning Score (NEWS) and near patient testing in acute medical admissions. *Eur J Intern Med.* 2016 Nov;35:78–82.
102. Wheeler I, Price C, Sitch A, Banda P, Kellett J, Nyirenda M, et al. Early warning scores generated in developed healthcare settings are not sufficient at predicting early mortality in Blantyre, Malawi: a prospective cohort study. *PLoS One.* 2013;8(3):e59830–e59830.

103. Graziadio S, O'Leary RA, Stocken DD, Power M, Allen AJ, Simpson AJ, et al. Can mid-regional pro-adrenomedullin (MR-proADM) increase the prognostic accuracy of NEWS in predicting deterioration in patients admitted to hospital with mild to moderately severe illness? A prospective single-centre observational study. *BMJ Open*. 2019 Feb 22;8(11):e020337–e020337.

Table S1. Risk of bias assessment results

| TOOL    | Study                           | Validation            | Quality      |               |
|---------|---------------------------------|-----------------------|--------------|---------------|
|         |                                 |                       | Risk of bias | Applicability |
| PROBAST | Kellett, 2012 (S1)              | External              | low          | low           |
|         | Kim, 2017 (S2)                  | External              | Unclear      | unclear       |
|         | Bozkurt, 2015 (S3)              | External              | High         | high          |
|         | Seak, 2017 (S4)                 | External              | High         | high          |
|         | Hu, 2016 (S5)                   | Internal              | Unclear      | high          |
|         | Liljehult, 2016 (S6)            | External              | Unclear      | high          |
|         | Mulligan, 2010 (S7)             | External              | High         | high          |
|         | Cooksley, 2012 (S8)             | External              | Unclear      | unclear       |
|         | Vaughn, 2018 (S9)               | External              | High         | high          |
|         | Young, 2014 (S10)               | External              | High         | high          |
|         | von Lilienfeld-Toal, 2007 (S11) | External              | Unclear      | high          |
|         | Pedersen, 2018 (S12)            | External and Internal | low          | low           |
|         | Forster, 2018 (S13)             | External              | low          | low           |
|         | Pimentel, 2018 (S14)            | External              | low          | unclear       |
|         | Sbiti-rohr, 2016 (S15)          |                       | Unclear      | high          |
|         | Brabrand, 2017 (S16)            | External              | Unclear      | unclear       |
|         | Jo, 2016 (S17)                  | External              | High         | high          |
|         | Barlow, 2007 (S18)              | External              | low          | unclear       |
|         | Bilben, 2016 (S19)              | External              | Unclear      | unclear       |
|         | Delahanty, 2019 (S20)           | Internal              | low          | low           |
|         | Redfern, 2018 (S21)             | External              | low          | low           |
|         | Churpek, 2017 (S22)             | External              | High         | high          |
|         | Faisal, 2019 (S23)              | External              | low          | low           |
|         | Churpek 2017 (S24)              | External              | low          | low           |
|         | Henry, 2015 (S25)               | Internal              | low          | low           |
|         | Brink 2019 (S26)                | External              | Unclear      | unclear       |
|         | de Groot, 2014 (S27)            | External              | Unclear      | unclear       |
|         | Corfield, 2014 (S28)            | External              | low          | low           |
|         | Goulden, 2018 (S29)             | External              | Unclear      | unclear       |
|         | Khwannimit, 2019 (S30)          | External              | Unclear      | unclear       |
|         | Ghanem-Zoubi, 2011 (S31)        | External              | Unclear      | unclear       |
|         | Saeed, 2019 (S32)               | Internal              | Unclear      | unclear       |
|         | Innocenti, 2018 (S33)           | External              | Unclear      | unclear       |
|         | Camm, 2018 (S34)                | External              | Unclear      | unclear       |
|         | Tirotta, 2017 (S35)             | External              | Unclear      | unclear       |
|         | Pong, 2019 (S36)                | Internal              | Unclear      | unclear       |
|         | Prabhakar, 2019 (S37)           | Internal              | Unclear      | unclear       |
|         | Martino, 2018 (S38)             | External              | Unclear      | unclear       |
|         | Vorwerk, 2009 (S39)             | External              | Unclear      | unclear       |
|         | Qin, 2017 (S40)                 | External              | Unclear      | unclear       |
|         | Schmedding, 2019 (S41)          | External              | Unclear      | unclear       |
|         | Albur, 2016 (S42)               | External              | Unclear      | unclear       |
|         | Cildir, 2013 (S43)              | External              | Unclear      | unclear       |
|         | Chiew, 2019 (S44)               | External              | Unclear      | unclear       |

|                          |                       |         |         |
|--------------------------|-----------------------|---------|---------|
| Samsudin, 2018 (S45)     | Internal              | Unclear | unclear |
| Chang, 2018 (S46)        | External              | Unclear | high    |
| Geier, 2013 (S47)        | External              | Unclear | unclear |
| Asimwe, 2015 (S48)       | Internal              | Unclear | unclear |
| Hung, 2017 (S49)         | External              | Unclear | high    |
| Garcea, 2006 (S50)       | External              | Unclear | high    |
| Yoo, 2015 (S51)          | External              | Unclear | unclear |
| Siddiqui, 2017 (S52)     | External              | Unclear | unclear |
| Calvert, 2016 (S53)      | Internal              | low     | unclear |
| Awad, 2017 (S54)         | Internal              | low     | low     |
| Reini, 2012 (S55)        | External              | Unclear | unclear |
| Chen, 2019 (S56)         | External              | Unclear | high    |
| Baker, 2015 (S57)        | External              | Unclear | unclear |
| Gök, 2019 (S58)          | External              | low     | unclear |
| Moseson, 2014 (S59)      | External              | Unclear | unclear |
| Jo, 2013 (S60)           | External              | Unclear | unclear |
| Kwon, 2018 (S61)         | External and Internal | Unclear | unclear |
| Usman, 2019 (S62)        | External              | High    | high    |
| Jang, 2019 (S63)         | Internal              | low     | low     |
| Wei, 2019 (S64)          | External              | High    | high    |
| Lee, 2019 (S65)          | Internal              | low     | low     |
| Singer, 2017 (S66)       | External              | Unclear | unclear |
| Eick, 2015 (S67)         | External              | Unclear | unclear |
| Bulut, 2014 (S68)        | External              | Unclear | unclear |
| Kivipuro, 2018 (S69)     | External              | Unclear | unclear |
| Eckart, 2019 (S70)       | External              | Unclear | unclear |
| Ho, 2013 (S71)           | External              | Unclear | unclear |
| Skitch, 2018 (S72)       | External              | Unclear | unclear |
| Liu, 2014 (S73)          | Internal              | low     | unclear |
| Dundar, 2016 (S74)       | External              | Unclear | high    |
| Yuan, 2018 (S75)         | External              | Unclear | high    |
| Naidoo, 2014 (S76)       | External              | Unclear | unclear |
| Liu, 2015 (S77)          | External              | low     | unclear |
| So, 2015 (S78)           | External              | Unclear | unclear |
| Dundar, 2019 (S79)       | External              | Unclear | high    |
| Lam, 2006 (S80)          | External              | Unclear | unclear |
| Xie, 2018 (S81)          | External              | Unclear | unclear |
| Cattermole, 2009 (S82)   | Internal              | Unclear | unclear |
| Heitz, 2010 (S83)        | External              | High    | unclear |
| Srivilaithon, 2019 (S84) | Internal              | Unclear | unclear |
| Cattermole, 2014 (S85)   | External              | Unclear | unclear |
| Najafi, 2018 (S86)       | External              | Unclear | high    |
| Bartkowiak, 2019 (S87)   | External              | Unclear | unclear |
| Kovacs, 2016 (S88)       | External              | low     | low     |
| Plate, 2018 (S89)        | External              | low     | low     |
| Sarani, 2012 (S90)       | External              | low     | low     |
| Hollis, 2016 (S91)       | External              | Unclear | unclear |

|                           |          |         |         |
|---------------------------|----------|---------|---------|
| Gardner-Thorpe 2006 (S92) | External | Unclear | unclear |
| Garcea, 2010 (S93)        | External | High    | high    |
| Cuthbertson, 2007 (S94)   | External | High    | unclear |
| Prytherch, 2010 (S95)     | Internal | low     | low     |
| Smith, 2013 (S96)         | External | low     | low     |
| Ramsussen, 2018 (S97)     | External | Unclear | unclear |
| Ghosh, 2018 (S98)         | Internal | low     | low     |
| Duckitt, 2007 (S99)       | Internal | low     | low     |
| Colombo, 2017 (S100)      | External | High    | high    |
| Abbot, 2016 (S101)        | External | High    | high    |
| Wheeler, 2013 (S102)      | External | Unclear | unclear |
| Graziadio, 2019 (S103)    | External | Unclear | unclear |



Table S2. Early warning scores used in studies of patients' sub-populations and settings

|                                 |       | HR | SBP | RR | Temp | APVU/LOC | O2 Sat | Supp O2 | Urine OP | Other |
|---------------------------------|-------|----|-----|----|------|----------|--------|---------|----------|-------|
| Kellett, 2012 (S1)              | IEWS  | ✓  | ✓   | ✓  | ✓    | X        | ✓      | ✓       | X        | X     |
| Seak, 2017 (S4)                 | MEWS  | ✓  | ✓   | ✓  | ✓    | ✓        | X      | X       | X        | X     |
| Bozkurt, 2015 (S3)              | MEWS  | ✓  | ✓   | ✓  | ✓    | ✓        | X      | X       | X        | X     |
| Kim, 2017 (S2)                  | NEWS  | ✓  | ✓   | ✓  | ✓    | ✓        | ✓      | ✓       | X        | X     |
| Hu, 2016 (S5)                   | IEWS  | ✓  | ✓   | ✓  | ✓    | ✓        | ✓      | ✓       | X        | X     |
| Mulligan, 2010 (S7)             | EWS   | ✓  | ✓   | ✓  | ✓    | ✓        | X      | X       | X        | X     |
| Liljehult, 2016 (S6)            | EWS   | ✓  | ✓   | ✓  | ✓    | ✓        | ✓      | ✓       | X        | X     |
| Cooksley, 2012 (S8)             | MEWS  | ✓  | ✓   | ✓  | ✓    | ✓        | ✓      | X       | ✓        | X     |
| Cooksley, 2012 (S8)             | NEWS  | ✓  | ✓   | ✓  | ✓    | ✓        | ✓      | ✓       | X        | X     |
| Vaughn, 2018 (S9)               | MEWS  | ✓  | ✓   | ✓  | ✓    | ✓        | X      | X       | X        | X     |
| Von Lilienfeld-Toal, 2007 (S11) | MEWS  | ✓  | ✓   | ✓  | ✓    | ✓        | X      | X       | X        | X     |
| Young, 2014 (S10)               | MEWS  | ✓  | ✓   | ✓  | ✓    | X        | X      | X       | X        | ✓     |
| Barlow, 2007 (S18)              | EWS   | ✓  | ✓   | ✓  | ✓    | ✓        | ✓      | X       | ✓        | X     |
| Bilben, 2016 (S19)              | NEWS  | ✓  | ✓   | ✓  | ✓    | ✓        | ✓      | ✓       | X        | X     |
| Brabrand, 2017 (S16)            | NEWS  | ✓  | ✓   | ✓  | ✓    | ✓        | ✓      | ✓       | X        | X     |
| Forster, 2018 (S13)             | NEWS  | ✓  | ✓   | ✓  | ✓    | ✓        | ✓      | ✓       | ✓        | X     |
| Jo, 2016 (S16)                  | NEWS  | ✓  | ✓   | ✓  | ✓    | ✓        | ✓      | ✓       | X        | X     |
| Pedersen, 2018 (S12)            | NEWS  | ✓  | ✓   | ✓  | ✓    | ✓        | ✓      | ✓       | X        | X     |
| Pimentel, 2018 (S14)            | NEWS  | ✓  | ✓   | ✓  | ✓    | ✓        | ✓      | ✓       | X        | X     |
| Pimentel, 2018 (S14)            | NEWS2 | ✓  | ✓   | ✓  | ✓    | ✓        | ✓      | ✓       | X        | ✓     |
| Sbiti-rohr, 2016 (S15)          | NEWS  | ✓  | ✓   | ✓  | ✓    | ✓        | ✓      | ✓       | X        | X     |
| Henry, 2015 (S25)               | MEWS  | ✓  | ✓   | ✓  | ✓    | ✓        | X      | X       | X        | X     |
| Innocenti, 2018 (S33)           | MEWS  | ✓  | ✓   | ✓  | ✓    | ✓        | X      | X       | X        | X     |
| Garcea, 2006 (S50)              | EWS   | ✓  | ✓   | ✓  | ✓    | ✓        | X      | X       | ✓        | X     |
| Qin, 2017 (S40)                 | MEWS  | ✓  | ✓   | ✓  | ✓    | ✓        | X      | X       | X        | X     |
| Albur, 2016 (S42)               | EWS   | ✓  | ✓   | ✓  | ✓    | ✓        | ✓      | X       | X        | X     |
| Asiimwe, 2015 (S48)             | MEWS  | ✓  | ✓   | ✓  | ✓    | ✓        | X      | X       | X        | X     |
| Brink 2019 (S26)                | NEWS  | ✓  | ✓   | ✓  | ✓    | ✓        | ✓      | ✓       | X        | X     |
| Camm, 2018 (S34)                | NEWS  | ✓  | ✓   | ✓  | ✓    | ✓        | ✓      | ✓       | X        | X     |
| Chang, 2018 (S46)               | MEWS  | ✓  | ✓   | ✓  | ✓    | ✓        | X      | X       | X        | X     |
| Chiew, 2019 (S44)               | MEWS  | ✓  | ✓   | ✓  | ✓    | ✓        | X      | X       | X        | X     |
| Chiew, 2019 (S44)               | NEWS  | ✓  | ✓   | ✓  | ✓    | ✓        | ✓      | ✓       | X        | X     |
| Churpek, 2017 (S22)             | NEWS  | ✓  | ✓   | ✓  | ✓    | ✓        | ✓      | ✓       | X        | X     |
| Churpek, 2017 (S22)             | MEWS  | ✓  | ✓   | ✓  | ✓    | ✓        | X      | X       | X        | X     |
| Churpek, 2017 (S24)             | NEWS  | ✓  | ✓   | ✓  | ✓    | ✓        | ✓      | ✓       | X        | X     |
| Churpek, 2017 (S24)             | MEWS  | ✓  | ✓   | ✓  | ✓    | ✓        | X      | X       | X        | X     |

|                          |          |   |   |   |   |   |   |   |   |   |
|--------------------------|----------|---|---|---|---|---|---|---|---|---|
| Cildir, 2013 (S43)       | MEWS     | ✓ | ✓ | ✓ | ✓ | ✓ | X | X | X | X |
| Corfield, 2014 (S28)     | NEWS     | ✓ | ✓ | ✓ | ✓ | ✓ | ✓ | ✓ | X | X |
| De Groot, 2014 (S27)     | NEWS     | ✓ | ✓ | ✓ | ✓ | ✓ | ✓ | ✓ | X | X |
| De Groot, 2014 (S27)     | MEWS     | ✓ | ✓ | ✓ | ✓ | ✓ | X | X | X | X |
| Delahanty, 2019 (S20)    | NEWS     | ✓ | ✓ | ✓ | ✓ | ✓ | ✓ | ✓ | X | X |
| Delahanty, 2019 (S20)    | MEWS     | ✓ | ✓ | ✓ | ✓ | ✓ | X | X | X | X |
| Faisal, 2019 (S23)       | NEWS     | ✓ | ✓ | ✓ | ✓ | ✓ | ✓ | ✓ | X | X |
| Geier, 2013 (S47)        | MEWS     | ✓ | ✓ | ✓ | ✓ | ✓ | X | X | X | X |
| Ghanem-Zoubi, 2011 (S31) | MEWS     | ✓ | ✓ | ✓ | ✓ | ✓ | X | X | X | X |
| Goulden, 2018 (S29)      | NEWS     | ✓ | ✓ | ✓ | ✓ | ✓ | ✓ | ✓ | X | X |
| Hung, 2017 (S49)         | MEWS     | ✓ | ✓ | ✓ | ✓ | ✓ | X | X | X | X |
| Khwannimit, 2019 (S30)   | NEWS     | ✓ | ✓ | ✓ | ✓ | ✓ | ✓ | ✓ | X | X |
| Khwannimit, 2019 (S30)   | SOS      | ✓ | ✓ | ✓ | ✓ | ✓ | X | X | ✓ | X |
| Khwannimit, 2019 (S30)   | MEWS     | ✓ | ✓ | ✓ | ✓ | ✓ | X | X | X | X |
| Martino, 2018 (S30)      | MEWS     | ✓ | ✓ | ✓ | ✓ | ✓ | X | X | X | X |
| Pong, 2019 (S36)         | NEWS     | ✓ | ✓ | ✓ | ✓ | ✓ | ✓ | ✓ | X | X |
| Pong, 2019 (S36)         | MEWS     | ✓ | ✓ | ✓ | ✓ | ✓ | X | X | X | X |
| Prabhakar, 2019 (S37)    | MEWS     | ✓ | ✓ | ✓ | ✓ | ✓ | X | X | X | X |
| Prabhakar, 2019 (S37)    | NEWS     | ✓ | ✓ | ✓ | ✓ | ✓ | ✓ | ✓ | X | X |
| Redfern, 2018 (S21)      | NEWS     | ✓ | ✓ | ✓ | ✓ | ✓ | ✓ | ✓ | X | X |
| Saeed, 2019 (S32)        | NEWS     | ✓ | ✓ | ✓ | ✓ | ✓ | ✓ | ✓ | X | X |
| Samsudin, 2018 (S45)     | MEWS     | ✓ | ✓ | ✓ | ✓ | ✓ | X | X | X | X |
| Samsudin, 2018 (S45)     | NEWS     | ✓ | ✓ | ✓ | ✓ | ✓ | ✓ | ✓ | X | X |
| Schmedding, 2019 (S41)   | MEWS     | ✓ | ✓ | ✓ | ✓ | ✓ | X | X | X | X |
| Siddiqui, 2017 (S52)     | EWS      | ✓ | ✓ | ✓ | ✓ | ✓ | ✓ | X | X | X |
| Tirotta, 2017 (S35)      | MEWS     | ✓ | ✓ | ✓ | ✓ | ✓ | X | X | X | X |
| Vorwerk, 2009 (S39)      | MEWS     | ✓ | ✓ | ✓ | ✓ | ✓ | X | X | X | X |
| Yoo, 2015 (S51)          | MEWS     | ✓ | ✓ | ✓ | ✓ | ✓ | X | X | X | X |
| Awad, 2017 (S54)         | NEWS     | ✓ | ✓ | ✓ | ✓ | ✓ | ✓ | ✓ | X | X |
| Baker, 2015 (S57)        | NEWS     | ✓ | ✓ | ✓ | ✓ | ✓ | ✓ | ✓ | X | X |
| Calvert 2016 (S53)       | MEWS     | ✓ | ✓ | ✓ | ✓ | ✓ | X | X | X | X |
| Gök, 2019 (S58)          | MEWS     | ✓ | ✓ | ✓ | ✓ | ✓ | X | X | X | X |
| Chen, 2019 (S56)         | NEWS     | ✓ | ✓ | ✓ | ✓ | ✓ | ✓ | ✓ | X | X |
| Jo, 2013 (S60)           | HOTEL    | X | ✓ | X | ✓ | ✓ | ✓ | X | X | ✓ |
| Jo, 2013 (S60)           | VIEWS    | ✓ | ✓ | ✓ | ✓ | ✓ | ✓ | ✓ | X | X |
| Moseson, 2014 (S59)      | MEWS     | ✓ | ✓ | ✓ | ✓ | ✓ | X | X | X | X |
| Reini, 2012 (S55)        | MEWS     | ✓ | ✓ | ✓ | ✓ | ✓ | X | X | X | X |
| Bulut, 2014 (S68)        | MEWS     | ✓ | ✓ | ✓ | ✓ | ✓ | X | X | X | X |
| Cattermole, 2009 (S82)   | MEWS     | ✓ | ✓ | ✓ | ✓ | ✓ | X | X | X | X |
| Cattermole, 2014 (S85)   | WORTHING | ✓ | ✓ | ✓ | ✓ | ✓ | ✓ | X | X | X |

|                           |       |   |   |   |   |   |   |   |   |   |
|---------------------------|-------|---|---|---|---|---|---|---|---|---|
| Cattermole, 2014 (S85)    | NEWS  | ✓ | ✓ | ✓ | ✓ | ✓ | ✓ | ✓ | X | X |
| Cattermole, 2014 (S85)    | MEWS  | ✓ | ✓ | ✓ | ✓ | ✓ | X | X | X | X |
| Heitz, 2010 (S83)         | MEWS  | ✓ | ✓ | ✓ | ✓ | ✓ | X | X | X | X |
| Dundar, 2016 (S74)        | MEWS  | ✓ | ✓ | ✓ | ✓ | ✓ | X | X | X | X |
| Dundar, 2016 (S74)        | VIEWS | ✓ | ✓ | ✓ | ✓ | ✓ | ✓ | ✓ | X | X |
| Dundar, 2019 (S79)        | NEWS  | ✓ | ✓ | ✓ | ✓ | ✓ | ✓ | ✓ | X | X |
| Eckart, 2019 (S70)        | NEWS  | ✓ | ✓ | ✓ | ✓ | ✓ | ✓ | ✓ | X | X |
| Eick, 2015 (S67)          | MEWS  | ✓ | ✓ | ✓ | ✓ | ✓ | X | X | X | X |
| Liu, 2015 (S77)           | NEWS  | ✓ | ✓ | ✓ | ✓ | ✓ | ✓ | ✓ | X | X |
| Liu, 2015 (S77)           | MEWS  | ✓ | ✓ | ✓ | ✓ | ✓ | X | X | X | X |
| Ho, 2013 (S71)            | MEWS  | ✓ | ✓ | ✓ | ✓ | ✓ | X | X | X | X |
| Jang, 2019 (S63)          | MEWS  | ✓ | ✓ | ✓ | ✓ | ✓ | X | X | X | X |
| Kivipuro, 2018 (S69)      | NEWS  | ✓ | ✓ | ✓ | ✓ | ✓ | ✓ | ✓ | X | X |
| Kwon, 2018 (S61)          | MEWS  | ✓ | ✓ | ✓ | ✓ | ✓ | X | X | X | X |
| Liu, 2014 (S73)           | MEWS  | ✓ | ✓ | ✓ | ✓ | ✓ | X | X | X | X |
| Lee, 2019 (S65)           | MEWS  | ✓ | ✓ | ✓ | ✓ | ✓ | X | X | X | X |
| Lee, 2019 (S65)           | NEWS  | ✓ | ✓ | ✓ | ✓ | ✓ | ✓ | ✓ | X | X |
| Lee, 2019 (S65)           | TREWS | ✓ | ✓ | ✓ | ✓ | ✓ | X | X | X | ✓ |
| Naidoo, 2014 (S76)        | TREWS | ✓ | ✓ | ✓ | ✓ | ✓ | X | X | X | ✓ |
| Najafi, 2018 (S86)        | NEWS  | ✓ | ✓ | ✓ | ✓ | ✓ | ✓ | ✓ | X | X |
| Singer, 2017 (S66)        | MEWS  | ✓ | ✓ | ✓ | ✓ | ✓ | X | X | X | X |
| Skitch, 2018 (S72)        | HEWS  | ✓ | ✓ | ✓ | ✓ | ✓ | ✓ | ✓ | X | X |
| Skitch, 2018 (S72)        | NEWS  | ✓ | ✓ | ✓ | ✓ | ✓ | ✓ | ✓ | X | X |
| So, 2015 (S78)            | MEWS  | ✓ | ✓ | ✓ | ✓ | ✓ | X | X | X | X |
| Srivilaithon, 2019 (S84)  | NEWS  | ✓ | ✓ | ✓ | ✓ | ✓ | ✓ | ✓ | X | X |
| Lam, 2006 (S80)           | MEWS  | ✓ | ✓ | ✓ | ✓ | ✓ | X | X | X | X |
| Usman, 2019 (S62)         | NEWS  | ✓ | ✓ | ✓ | ✓ | ✓ | ✓ | ✓ | X | X |
| Yuan, 2018 (S75)          | NEWS  | ✓ | ✓ | ✓ | ✓ | ✓ | ✓ | ✓ | X | X |
| Yuan, 2018 (S75)          | MEWS  | ✓ | ✓ | ✓ | ✓ | ✓ | X | X | X | X |
| Wei, 2019 (S64)           | MEWS  | ✓ | ✓ | ✓ | ✓ | ✓ | X | X | X | X |
| Xie, 2018 (S81)           | MEWS  | ✓ | ✓ | ✓ | ✓ | ✓ | X | X | X | X |
| Bartkowiak, 2019 (S87)    | NEWS  | ✓ | ✓ | ✓ | ✓ | ✓ | ✓ | ✓ | X | X |
| Bartkowiak, 2019 (S87)    | MEWS  | ✓ | ✓ | ✓ | ✓ | ✓ | X | X | ✓ | X |
| Cuthbertson, 2007 (S94)   | EWS   | ✓ | ✓ | ✓ | ✓ | X | ✓ | X | X | X |
| Cuthbertson, 2007 (S94)   | MEWS  | ✓ | ✓ | ✓ | ✓ | X | ✓ | X | X | X |
| Garcea, 2010 (S50)        | EWS   | ✓ | ✓ | ✓ | ✓ | ✓ | X | X | ✓ | X |
| Gardner-Thorpe 2006 (S92) | MEWS  | ✓ | ✓ | ✓ | ✓ | ✓ | X | X | ✓ | X |
| Hollis, 2016 (S91)        | EWS   | ✓ | ✓ | ✓ | ✓ | ✓ | ✓ | X | X | X |
| Kovacs, 2016 (S88)        | NEWS  | ✓ | ✓ | ✓ | ✓ | ✓ | ✓ | ✓ | X | X |
| Plate, 2018 (S89)         | VIEWS | ✓ | ✓ | ✓ | ✓ | ✓ | ✓ | ✓ | X | X |

|                        |        |   |   |   |   |   |   |   |   |   |
|------------------------|--------|---|---|---|---|---|---|---|---|---|
| Sarani, 2012 (S90)     | MEWS   | ✓ | ✓ | ✓ | ✓ | ✓ | X | X | X | X |
| Abbott, 2016 (S101)    | NEWS   | ✓ | ✓ | ✓ | ✓ | ✓ | ✓ | ✓ | X | X |
| Duckitt, 2007 (S99)    | WPC    | ✓ | ✓ | ✓ | ✓ | ✓ | ✓ | X | X | X |
| Duckitt, 2007 (S99)    | EWS    | ✓ | ✓ | ✓ | ✓ | ✓ | X | X | X | X |
| Colombo, 2017 (S100)   | MEWS   | ✓ | ✓ | ✓ | ✓ | ✓ | X | X | X | X |
| Ghosh, 2018 (S98)      | NEWS   | ✓ | ✓ | ✓ | ✓ | ✓ | ✓ | ✓ | X | X |
| Ghosh, 2018 (S98)      | MEWS   | ✓ | ✓ | ✓ | ✓ | ✓ | X | X | X | X |
| Graziadio, 2019 (S103) | NEWS   | ✓ | ✓ | ✓ | ✓ | ✓ | ✓ | ✓ | X | X |
| Prytherch, 2010 (S95)  | VIEWES | ✓ | ✓ | ✓ | ✓ | ✓ | ✓ | ✓ | X | X |
| Ramsussen, 2018 (S97)  | NEWS   | ✓ | ✓ | ✓ | ✓ | ✓ | ✓ | ✓ | X | X |
| Smith, 2013 (S96)      | NEWS   | ✓ | ✓ | ✓ | ✓ | ✓ | ✓ | ✓ | X | X |
| Wheeler, 2013 (S102)   | Hotel  | ✓ | X | ✓ | X | ✓ | ✓ | X | X | ✓ |
| Wheeler, 2013 (S102)   | MEWS   | ✓ | ✓ | ✓ | ✓ | ✓ | X | X | X | X |

|       |     |
|-------|-----|
| Total | 133 |
|-------|-----|

**Abbreviations:** HR: heart rate, SBP: systolic blood pressure, RR: respiratory rate, Temp: temperature, AVPU/LOC: alert, verbal response, physical response, unresponsive score or level of consciousness, O2 sat: Oxygen saturation, Supp O2: supplemental oxygen, Urine OP: urine output, Other: other parameters, i.e., blood biomarkers. VIEWES: Vitalpack early warning score, MEWS: modified early warning score, EWS: early warning score, NEWS: national early warning score, NEWS2: national early warning score 2, SOS: Search Out Severity score, Worthing: Worthing physiological scoring system, HOTEL: Hypotension, Oxygen saturation, Temperature, ECG abnormality, Loss of independence score, TREWS: Triage in Emergency department Early Warning Score, HEWS: Hamilton early warning score.

Figure S1. Predictive performance of early warning scores for mortality in studies from 2005 to 2020 for different disease subgroups and clinical settings

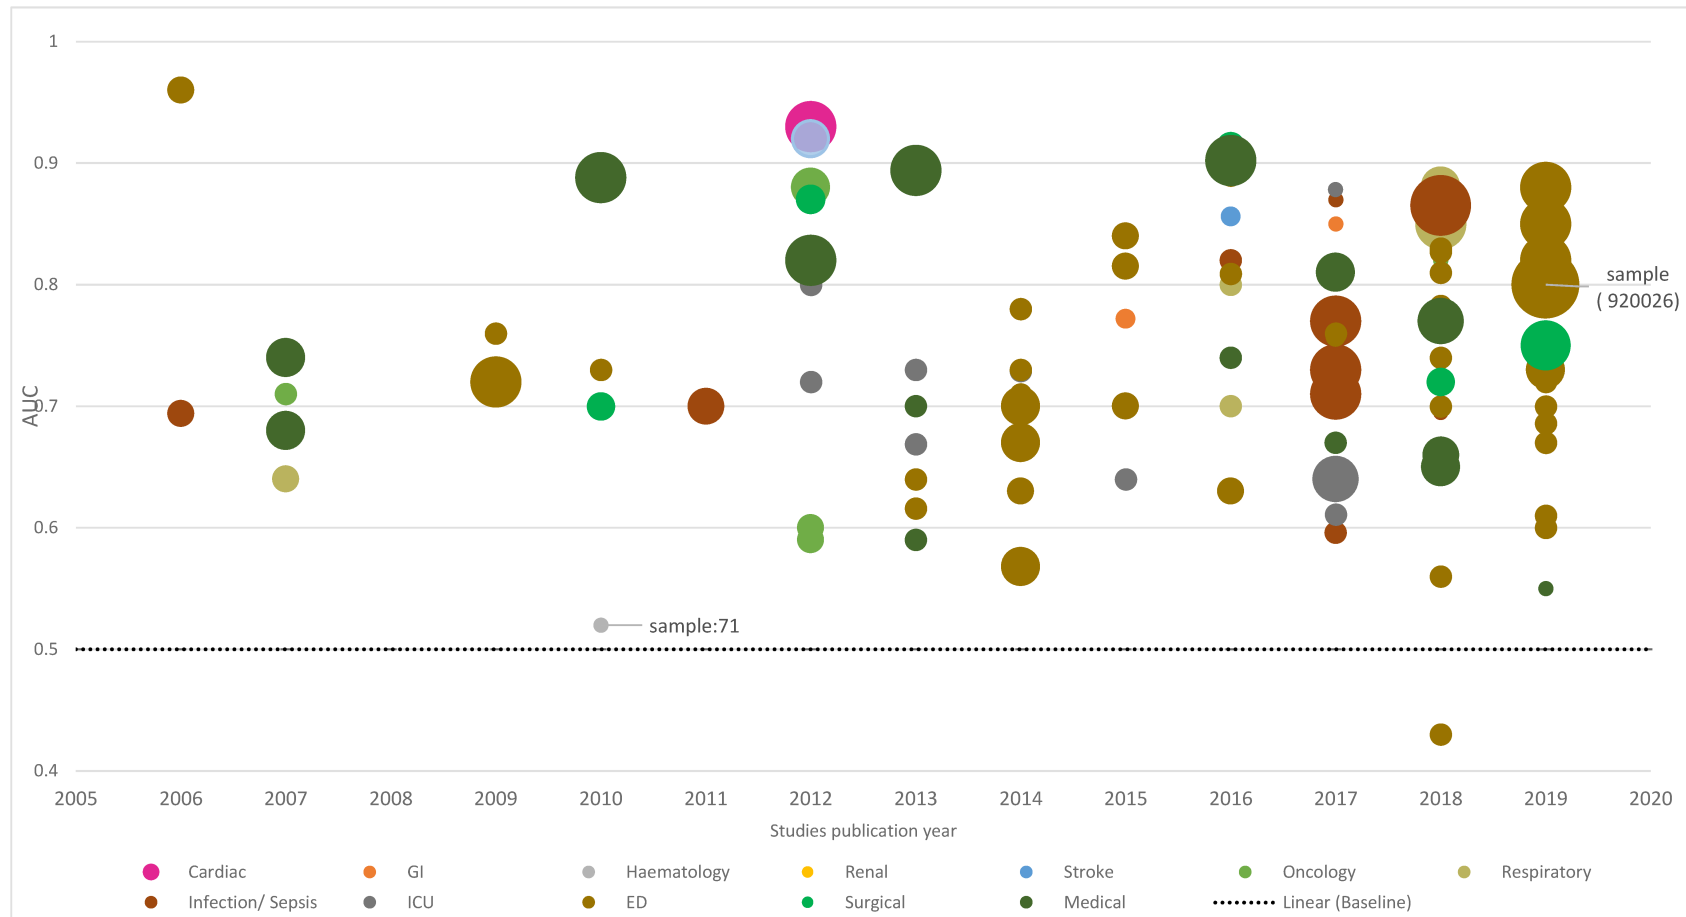

*Abbreviations:* AUC: Area Under the Curve; ED: Emergency Department; GI: Gastrointestinal diseases; ICU: Intensive Care Unit. Note: Bubbles sizes represents the sample size in each study.

Figure S2. Predictive performance of early warning scores for intensive care admission in studies from 2005 to 2020 for different disease subgroups and clinical settings

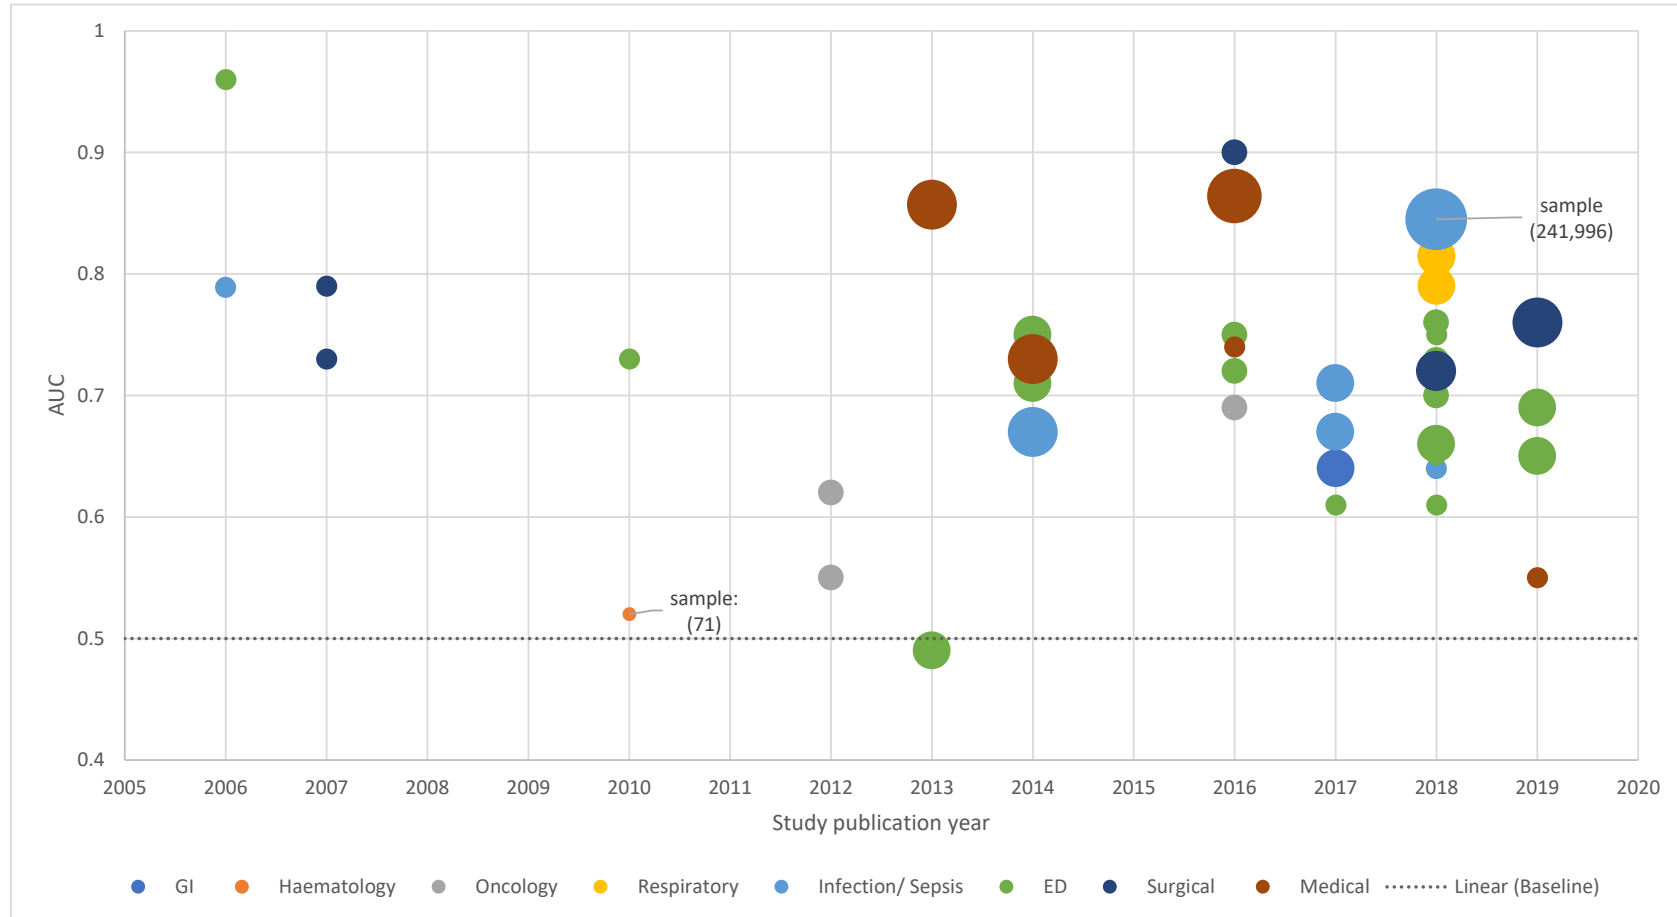

**Abbreviations:** AUC: Area Under the Curve; ED: Emergency Department; GI: Gastrointestinal diseases. Note: Bubbles sizes represents the sample size in each study.

Figure S3. Predictive performance of early warning scores for cardiac arrest in studies from 2012 to 2020 for different disease subgroups and clinical settings

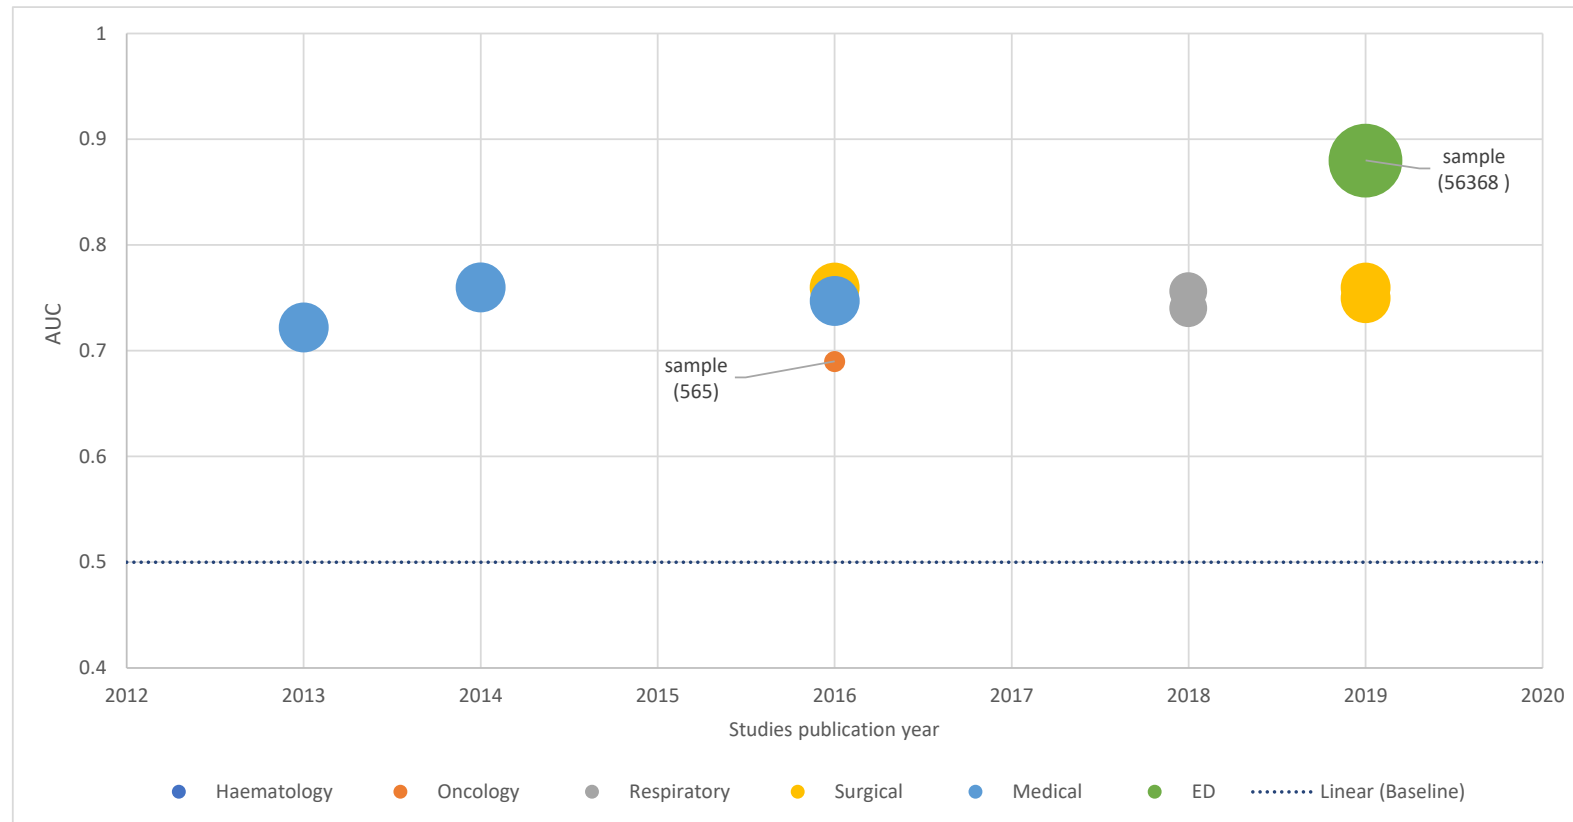

**Abbreviations:** AUC: Area Under the Curve; ED: Emergency Department; GI: Gastrointestinal diseases. Note: Bubbles sizes represents the sample size in each study.
